# Supplementary material for: HIRA-mediated H3.3 deposition preserves hepatocyte cell identity during liver aging
Source: Research Square preprint supplement (doi:10.21203/rs.3.rs-9261217/v1), 2026-06-01
Supplement: Supplementary file 2 [file c3006fa9c70eb8bff19bcba1.docx]

Suppl. Table 1: CosMX fibrosis score markers

| Gene No. | Marker |
| --- | --- |
| 1 | Col1a1 |
| 2 | Col1a2 |
| 3 | Col3a1 |
| 4 | Col4a1 |
| 5 | Col5a1 |
| 6 | Col6a1 |
| 7 | Fn1 |
| 8 | Vcan |
| 9 | Mmp14 |
| 10 | Mmp2 |
| 11 | Mmp7 |
| 12 | Mmp9 |
| 13 | Timp1 |
| 14 | Col1a1 |
| 15 | Col3a1 |
| 16 | Fn1 |
| 17 | Lcn2 |
| 18 | Tgfbr2 |
| 19 | Col1a1 |
| 20 | Col3a1 |
| 21 | Mmp2 |
| 22 | Pdgfrb |
| 23 | Timp1 |
| 24 | Cxcl14 |
| 25 | Itgb6 |
| 26 | Muc1 |
| 27 | Ccl2 |
| 28 | Cd68 |
| 29 | Il1b |
| 30 | Lgals3 |
| 31 | Spp1 |
| 32 | Tnf |
| 33 | Acta2 |
| 34 | Fap |
| 35 | Myh11 |
| 36 | Pdgfra |
| 37 | Pdgfrb |
| 38 | Tagln |
| 39 | Smad2 |
| 40 | Smad3 |
| 41 | Tgfb1 |
| 42 | Tgfbr1 |
| 43 | Tgfbr2 |
